# Supplementary material for: The Role of Artificial Intelligence in Prospective Real-Time Histological Prediction of Colorectal Lesions during Colonoscopy: A Systematic Review and Meta-Analysis
Source: MDPI journal article supplement (doi:10.3390/diagnostics13203267), 2023-10-20
Supplement: s1 [file s1]

**Supplementary table S1:** Search strategy to identify eligible articles for the systematic review.

| Database | Searches                               | Results     |
|----------|----------------------------------------|-------------|
| EMBASE   | artificial intelligence.mp.            | 104079      |
|          | AI.mp.                                 | 177311      |
|          | machine learning.mp.                   | 193600      |
|          | deep machine.mp.                       | 561         |
|          | exp artificial intelligence/           | 83362       |
|          | (computer-aided or computer aided).mp. | 77792       |
|          | 1or 2 or 3 or 4 or 5 or 6              | 500201      |
|          | (colorectal or colon or rectum).mp.    | 1490474     |
|          | exp colon/                             | 112270      |
|          | 8 or 9                                 | 1496654     |
|          | colonoscopy.mp.                        | 207143      |
|          | exp colonoscopy/                       | 103984      |
|          | 11 or 12                               | 208146      |
|          | 7 and 10 and 13                        | 3155        |
|          | remove duplicates from 14              | <b>2440</b> |
| OVID     | artificial intelligence.mp.            | 94748       |
|          | AI.mp.                                 | 158997      |
|          | machine learning.mp.                   | 157780      |
|          | deep machine.mp.                       | 492         |
|          | exp artificial intelligence/           | 176492      |
|          | (computer-aided or computer aided).mp. | 67377       |
|          | 1or 2 or 3 or 4 or 5 or 6              | 510381      |
|          | (colorectal or colon or rectum).mp.    | 1076512     |
|          | exp colon/                             | 74988       |
|          | 8 or 9                                 | 1076512     |
|          | colonoscopy.mp.                        | 144089      |
|          | exp colonoscopy/                       | 35024       |
|          | 11 or 12                               | 147439      |
|          | 7 and 10 and 13                        | 2467        |
|          | remove duplicates from 14              | <b>1888</b> |
